# Supplementary material for: Increased chromosomal radiosensitivity in asymptomatic carriers of a heterozygous BRCA1 mutation
Source: Springer Nature journal article supplement (doi:10.1186/s13058-016-0709-1), 2016-05-17
Supplement: MOESM1 [file 10131052]

## Additional file 1

### Primers

| <b>Amplicon (exon)</b>    | <b>Forward</b>            | <b>Reverse</b>             |
|---------------------------|---------------------------|----------------------------|
| c.1A>G (E2)               | TCTGCTCTGGGTAAAGGTAGTAGA  | GAAGGCCCTTTCTTCTGGTT       |
| c.1961del (E11)           | GGAAGTCTTCTACCAGGC        | TTAACTTCAGCTCTGGGAAAG      |
| c.2311T>C (E11) = SNP     | CCTAGCCTTCCAAGAGAAG       | CCATGAATTAGTCCCTTGG        |
| c.2359dup (E11)           | CCTAGCCTTCCAAGAGAAG       | CCATGAATTAGTCCCTTGG        |
| c.3331_3334del (E11)      | GTAGGTTCCAGTACTAATGAAG    | CTGAAATCAGATATGGAGAGAAATC  |
| c.3481_3491del (E11)      | CCATATCTGATTTTCAGATAACTTA | GATAAGTTCTTCTGAGGACTC      |
| c.3661G>T (E11)           | GCAGGAGTCCTAGCCCTTTC      | GGTTACTGCAGTCATTTAAGCTATTC |
| c.4327C>T (E13)           | GACTGCTCAGGGCTATCCTC      | CAGACACCTCAAACCTTGTCAGC    |
| c.4391_4393delinsTT (E14) | GACTCTTCTGCCCTTGAGGA      | AAGGGGATGACCTTTCCACT       |
