# Supplementary material for: Increased chromosomal radiosensitivity in asymptomatic carriers of a heterozygous BRCA1 mutation
Source: Springer Nature journal article supplement (doi:10.1186/s13058-016-0709-1), 2016-05-17

## Additional file 2

Fragment analysis of c.2311T>C in BC01 (forward)

Limited loss of mutant mRNA could be detected (mean ratio = 0.7). This is in agreement with the MiSeq data with a VAF of approximately 50%.

### a. cDNA

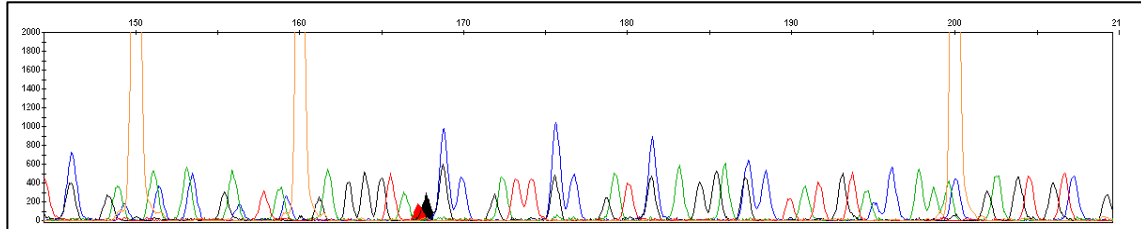

### b. cDNA with puromycin

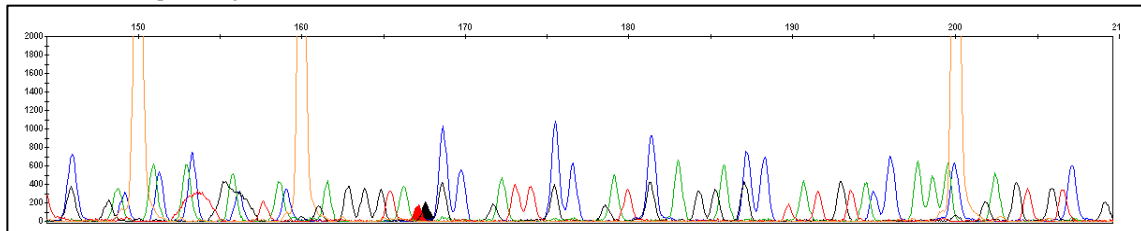

### c. genomic DNA

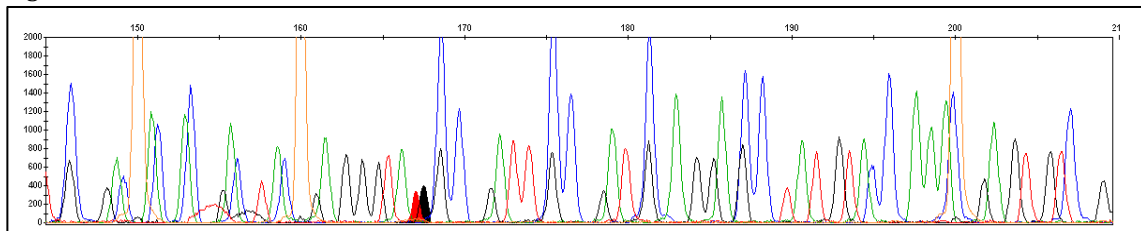

Supplement: MOESM2 [file 10131052]
